# Supplementary material
Source: publisher figshare collection journal article supplement (https://gsajournals.figshare.com/ndownloader/files/40191463)
Supplement: Supplementary file 1 [file 40191463]

## Sheet: ST3 - Starter strain isolates
Supplementary Table 3. List of clones isolated and sequenced from starter strain stocks.
Strain ploidy was assessed from the distribution of allele frequencies, as described in the Methods, and only reflects the majority of each strain's genome: i.e. strains may still have regions of aneuploidy or carry other major structural variation.
Isolate code	Pretty label	Replicate	Ploidy	Notes
FT-858a	*FT-858(a)	a	3
FT-858b	*FT-858(b)	b	3
FT-858c	*FT-858(c)	c	3
IRA-Da	*IRA-D(a)	a	3
IRA-Db	*IRA-D(b)	b	3
IRA-Dc	*IRA-D(c)	c	3	Excluded due to low coverage.
PE-2a	*PE-2(a)	a	2
PE-2b	*PE-2(b)	b	2
PE-2c	*PE-2(c)	c	2
SA-1a	*SA-1(a)	a	2
SA-1b	*SA-1(b)	b	2
SA-1c	*SA-1(c)	c	2
